# Supplementary material for: Endothelial progenitor cells in chronic obstructive pulmonary disease and emphysema
Source: PubMed Central journal article supplement (PMC5349667; doi:10.1371/journal.pone.0173446), 2017-03-14

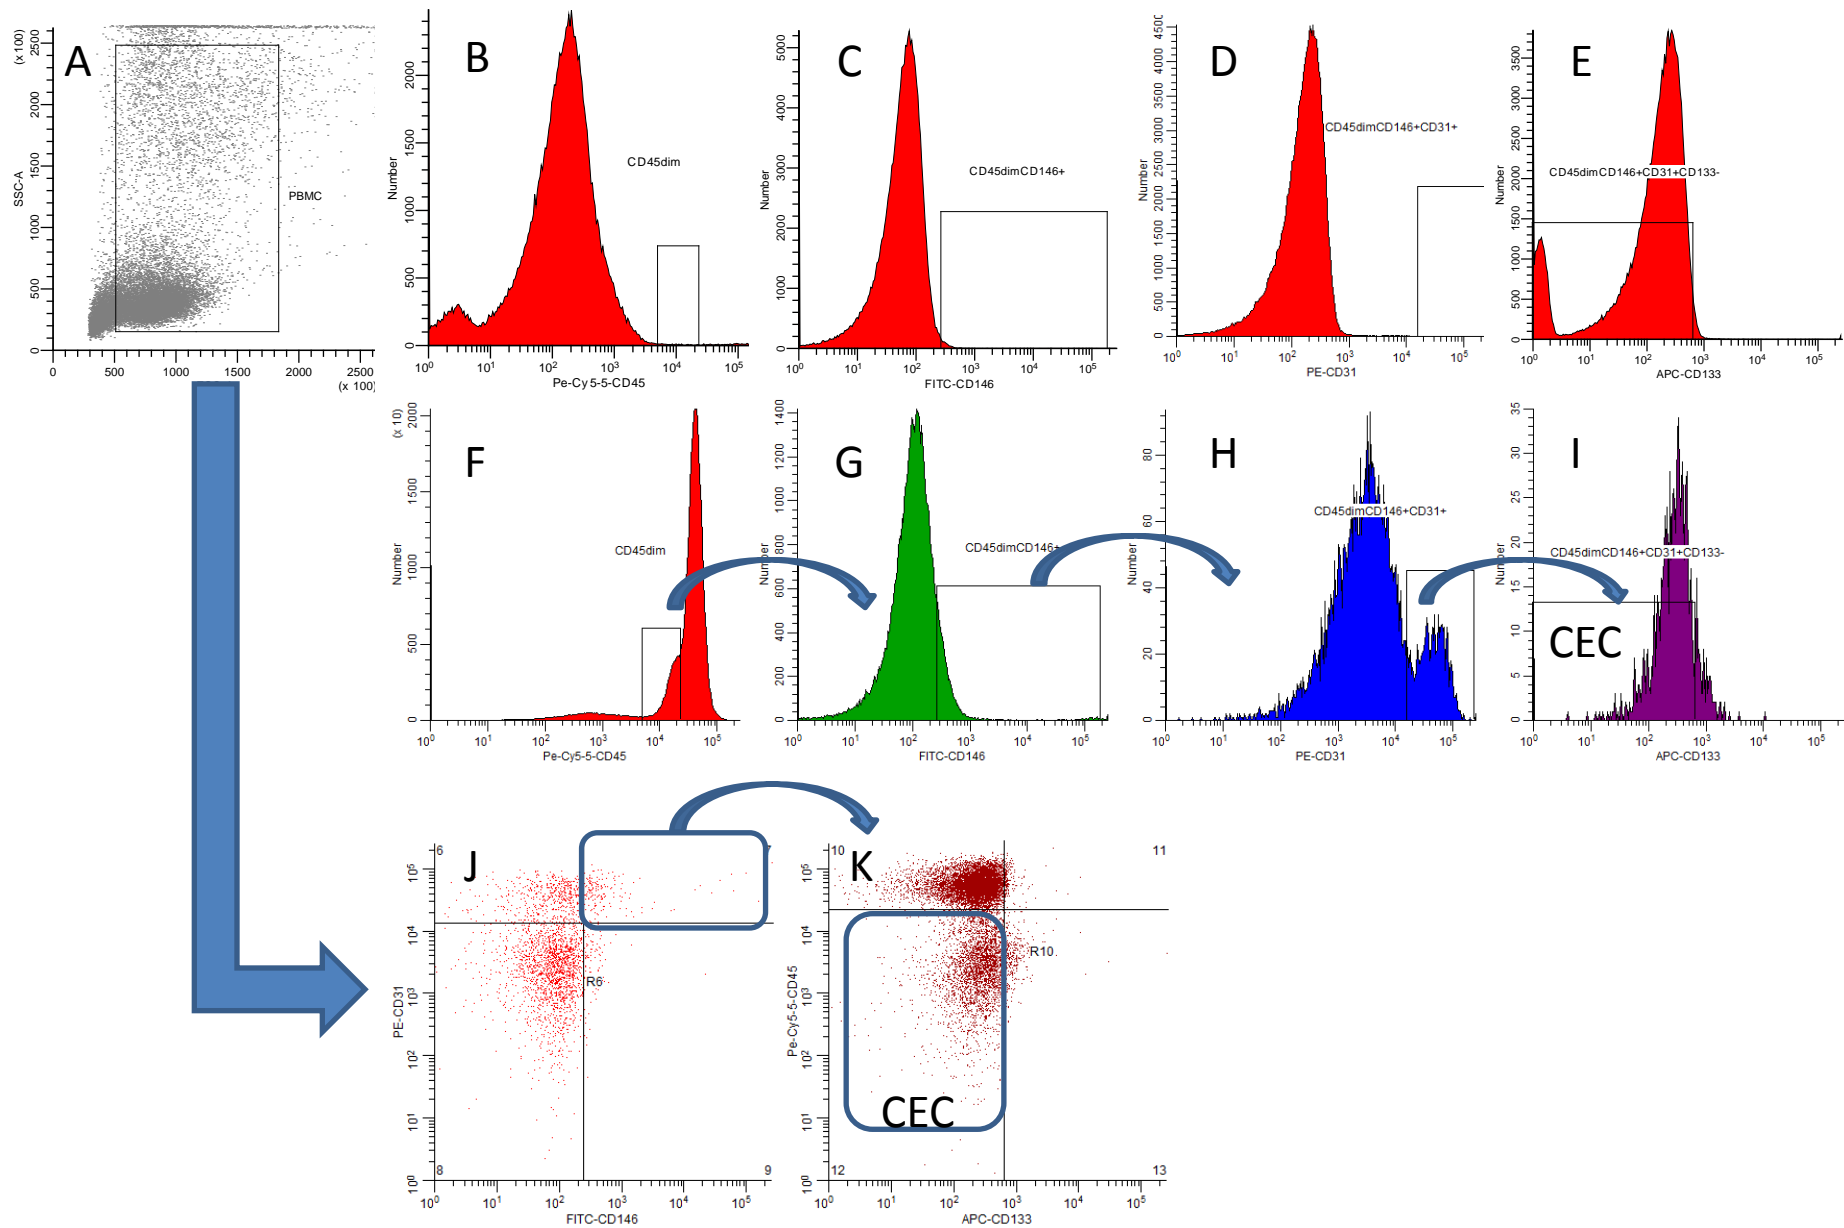

Supplement: pone.0173446.s005.pdf [file pone.0173446.s005.pdf]
